# Supplementary material
Source: PubMed Central journal article supplement (PMC3031144)
Supplement: NIHMS253809-supplement-01.pdf [file NIHMS253809-supplement-01.pdf]

# Using Google Street View to Audit Neighborhood Environments

Andrew G. Rundle, DrPH, Michael D.M. Bader, PhD, Catherine A. Richards, MPH, Kathryn M. Neckerman, PhD, Julien O. Teitler, PhD

## Appendix A

Percentage agreement between field audit and Street View measures (categorical measures only)

| Variable description                                          | % agree feature is absent | % agree feature is present | Total % agreement |
|---------------------------------------------------------------|---------------------------|----------------------------|-------------------|
| <b>Aesthetics</b>                                             |                           |                            |                   |
| Public art                                                    | 0.97                      | 0.00                       | 0.97              |
| Block composed of similar buildings                           | 0.24                      | 0.54                       | 0.78              |
| Buildings are ornate/decorative                               | 0.68                      | 0.05                       | 0.73              |
| Building have modern/postwar characteristics                  | 0.03                      | 0.46                       | 0.49              |
| Buildings are plain                                           | 0.05                      | 0.76                       | 0.81              |
| Street-level windows are fully or partially obscured          | 0.22                      | 0.19                       | 0.41              |
| Prewar buildings                                              | 0.22                      | 0.03                       | 0.24              |
| At least 90% of sidewalk bounded by a street wall             | 0.08                      | 0.81                       | 0.89              |
| <b>Physical disorder</b>                                      |                           |                            |                   |
| Stray animals present <sup>a</sup>                            | 0.92                      | 0.00                       | 0.92              |
| Building awnings torn                                         | 0.72                      | 0.00                       | 0.72              |
| Beer, wine, or liquor bottles present <sup>a,b</sup>          | 0.50                      | 0.08                       | 0.58              |
| Presence of an abandoned building                             | 0.62                      | 0.08                       | 0.70              |
| Buildings in disrepair                                        | 0.68                      | 0.03                       | 0.70              |
| Presence of overflowing trash cans <sup>a</sup>               | 0.54                      | 0.05                       | 0.59              |
| Abandoned cars                                                | 0.83                      | 0.03                       | 0.86              |
| Discarded cigarette or cigar butts <sup>a,b</sup>             | 0.03                      | 0.69                       | 0.72              |
| Discarded drug-related paraphernalia on street <sup>a,b</sup> | 0.90                      | 0.00                       | 0.90              |
| Graffiti on buildings                                         | 0.54                      | 0.14                       | 0.68              |
| Discarded household belongings on street <sup>a</sup>         | 0.49                      | 0.05                       | 0.54              |
| Pools of water on sidewalk <sup>a</sup>                       | 0.47                      | 0.03                       | 0.50              |
| Sidewalk in serious disrepair                                 | 0.81                      | 0.00                       | 0.81              |
| Building signage in disrepair                                 | 0.53                      | 0.00                       | 0.53              |
| Food-related trash on the sidewalk <sup>a,b</sup>             | 0.31                      | 0.22                       | 0.53              |
| Other garbage or litter on the street <sup>a,b</sup>          | 0.08                      | 0.59                       | 0.68              |
| Broken windows on buildings <sup>b</sup>                      | 0.73                      | 0.03                       | 0.76              |
| <b>Pedestrian safety</b>                                      |                           |                            |                   |
| First intersection: speed bump                                | 1.00                      | 0.00                       | 1.00              |
| First intersection: chicane                                   | 0.36                      | 0.00                       | 0.36              |
| First intersection: choker                                    | 1.00                      | 0.00                       | 1.00              |
| First intersection: traffic island                            | 0.86                      | 0.05                       | 0.92              |
| First intersection: pedestrian overpass                       | 0.95                      | 0.00                       | 0.95              |
| First intersection: painted crosswalk                         | 0.03                      | 0.89                       | 0.92              |
| First intersection: pedestrian crossing                       | 0.03                      | 0.84                       | 0.86              |
| First intersection: curb extension                            | 0.97                      | 0.00                       | 0.97              |

| <b>Variable description</b>                               | <b>% agree feature is absent</b> | <b>% agree feature is present</b> | <b>Total % agreement</b> |
|-----------------------------------------------------------|----------------------------------|-----------------------------------|--------------------------|
| First intersection: curb cut                              | 0.00                             | 0.03                              | 0.03                     |
| First intersection: pedestrian signals                    | 0.05                             | 0.81                              | 0.86                     |
| First intersection: crossing sign                         | 0.73                             | 0.00                              | 0.73                     |
| First intersection: stop sign                             | 0.73                             | 0.05                              | 0.78                     |
| First intersection: traffic light                         | 0.05                             | 0.86                              | 0.92                     |
| Second intersection: speed bump                           | 1.00                             | 0.00                              | 1.00                     |
| Second intersection: chicane                              | 1.00                             | 0.00                              | 1.00                     |
| Second intersection: choker                               | 1.00                             | 0.00                              | 1.00                     |
| Second intersection: traffic island                       | 0.86                             | 0.05                              | 0.92                     |
| Second intersection: pedestrian overpass                  | 0.97                             | 0.00                              | 0.97                     |
| Second intersection: painted crosswalk                    | 0.05                             | 0.84                              | 0.89                     |
| Second intersection: pedestrian crossing                  | 0.03                             | 0.76                              | 0.78                     |
| Second intersection: curb extension                       | 0.97                             | 0.00                              | 0.97                     |
| Second intersection: curb cut                             | 0.03                             | 0.00                              | 0.03                     |
| Second intersection: pedestrian signals                   | 0.14                             | 0.76                              | 0.89                     |
| Second intersection: crossing sign                        | 0.70                             | 0.00                              | 0.70                     |
| Second intersection: stop sign                            | 0.81                             | 0.03                              | 0.84                     |
| Second intersection: traffic light                        | 0.14                             | 0.86                              | 1.00                     |
| Grass or natural buffer between sidewalk and traffic      | 0.78                             | 0.00                              | 0.78                     |
| Physical buffer between sidewalk and traffic              | 0.89                             | 0.03                              | 0.92                     |
| <b>Motorized traffic and parking</b>                      |                                  |                                   |                          |
| Two-way traffic                                           | 0.35                             | 0.62                              | 0.97                     |
| One-way traffic flowing from first to second intersection | 0.76                             | 0.11                              | 0.86                     |
| One-way traffic flowing from second to first intersection | 0.76                             | 0.14                              | 0.89                     |
| Parallel parking permitted                                | 0.16                             | 0.73                              | 0.89                     |
| Parking prohibited on entire block                        | 0.70                             | 0.14                              | 0.84                     |
| Parking meters present                                    | 0.35                             | 0.46                              | 0.81                     |
| Diagonal parking                                          | 1.00                             | 0.00                              | 1.00                     |
| Idling or parked bus <sup>a</sup>                         | 0.78                             | 0.03                              | 0.81                     |
| Idling or parked truck <sup>a</sup>                       | 0.50                             | 0.11                              | 0.61                     |
| Trucks being loaded or unloaded <sup>a</sup>              | 0.62                             | 0.05                              | 0.68                     |
| <b>Infrastructure for active transportation</b>           |                                  |                                   |                          |
| Bus shelter                                               | 0.86                             | 0.11                              | 0.97                     |
| Bus stop                                                  | 0.57                             | 0.27                              | 0.84                     |
| Elevated subway line                                      | 0.81                             | 0.11                              | 0.92                     |
| Subway entrance                                           | 0.62                             | 0.24                              | 0.86                     |
| Sidewalk present                                          | 0.00                             | 0.97                              | 0.97                     |
| Concrete (vs brick or paver) sidewalk surface             | 0.00                             | 0.97                              | 0.97                     |
| Subway grate on sidewalk                                  | 0.17                             | 0.67                              | 0.84                     |
| <b>Sidewalk amenities</b>                                 |                                  |                                   |                          |
| Street-accessible automated teller machine                | 0.78                             | 0.03                              | 0.81                     |
| Bench                                                     | 0.95                             | 0.00                              | 0.95                     |
| Emergency phone                                           | 0.70                             | 0.00                              | 0.70                     |
| Newsstand                                                 | 0.86                             | 0.00                              | 0.86                     |
| Other (nonfood) vendors                                   | 0.83                             | 0.00                              | 0.83                     |
| <b>Human presence and social interactions</b>             |                                  |                                   |                          |
| People visible <sup>a</sup>                               | 0.00                             | 1.00                              | 1.00                     |
| Women present <sup>a</sup>                                | 0.00                             | 0.95                              | 0.95                     |
| Men present <sup>a</sup>                                  | 0.00                             | 1.00                              | 1.00                     |
| Older adults (aged ≥65 years) present <sup>a</sup>        | 0.08                             | 0.54                              | 0.62                     |

| Variable description                                    | % agree feature is absent | % agree feature is present | Total % agreement |
|---------------------------------------------------------|---------------------------|----------------------------|-------------------|
| Adults present <sup>a</sup>                             | 0.00                      | 0.97                       | 0.97              |
| Teenagers present <sup>a</sup>                          | 0.11                      | 0.43                       | 0.54              |
| Children present <sup>a</sup>                           | 0.05                      | 0.43                       | 0.49              |
| People shopping from street vendors <sup>a</sup>        | 0.69                      | 0.06                       | 0.74              |
| Loading/unloading of boxes into a basement <sup>a</sup> | 0.89                      | 0.00                       | 0.89              |
| Person distributing advertising flyers <sup>a</sup>     | 0.86                      | 0.00                       | 0.86              |
| Panhandlers present <sup>a</sup>                        | 0.89                      | 0.00                       | 0.89              |
| Political canvasser present <sup>a</sup>                | 1.00                      | 0.00                       | 1.00              |
| Person talking on a cell phone present <sup>a,b</sup>   | 0.03                      | 0.59                       | 0.62              |
| Doe Fund employee cleaning streets <sup>a</sup>         | 0.86                      | 0.03                       | 0.89              |
| Intoxicated person present <sup>a</sup>                 | 1.00                      | 0.00                       | 1.00              |
| Person eating <sup>a,b</sup>                            | 0.43                      | 0.11                       | 0.54              |
| Individuals engaged in a fight <sup>a</sup>             | 0.95                      | 0.00                       | 0.95              |
| Person distributing free papers <sup>a</sup>            | 0.86                      | 0.00                       | 0.86              |
| People playing chess or other games <sup>a</sup>        | 1.00                      | 0.00                       | 1.00              |
| Homeless person present <sup>a</sup>                    | 0.89                      | 0.03                       | 0.92              |
| Police present <sup>a</sup>                             | 0.38                      | 0.00                       | 0.38              |
| People sitting and reading <sup>a</sup>                 | 0.86                      | 0.00                       | 0.86              |
| People sitting in a group <sup>a</sup>                  | 0.59                      | 0.11                       | 0.70              |
| People sitting alone <sup>a</sup>                       | 0.46                      | 0.22                       | 0.68              |
| People smoking <sup>a,b</sup>                           | 0.27                      | 0.32                       | 0.59              |
| People standing and talking <sup>a</sup>                | 0.05                      | 0.54                       | 0.59              |
| People walking in a group <sup>a</sup>                  | 0.00                      | 0.70                       | 0.70              |
| People waiting for a bus <sup>a</sup>                   | 0.58                      | 0.25                       | 0.83              |

<sup>a</sup>Transient items

<sup>b</sup>Small items

## Appendix B

### Spearman rank-order correlations between field audit and Street View measures (continuous measures only)

| Variable description                                                             | Correlation | p-value | n  |
|----------------------------------------------------------------------------------|-------------|---------|----|
| <b>Aesthetics</b>                                                                |             |         |    |
| Number of banners on lamp posts                                                  | 0.46        | 0.004   | 37 |
| Number of flower pots on lamp posts                                              | 0.78        | <0.001  | 37 |
| Number of planters (large pots)                                                  | 0.69        | <0.001  | 35 |
| Number of flower or plant beds                                                   | 0.18        | 0.29    | 36 |
| Number of trees                                                                  | 0.61        | <0.001  | 37 |
| Number of building doors                                                         | 0.54        | 0.001   | 36 |
| Number of doors to ground-floor uses                                             | 0.62        | <0.001  | 36 |
| Number of doors to upper-floor uses                                              | 0.46        | 0.006   | 34 |
| Number of floors in tallest building                                             | 0.75        | <0.001  | 37 |
| Number of floors in shortest building                                            | 0.53        | 0.0007  | 37 |
| Percentage of block face that is blank wall at street level                      | 0.11        | 0.52    | 37 |
| Percentage of block face that is fencing                                         | 0.25        | 0.14    | 37 |
| Percentage of block face at street level that is windows                         | 0.34        | 0.04    | 36 |
| Number of window boxes                                                           | -0.08       | 0.64    | 37 |
| Percentage of block face with parking lots in front of commercial establishments | 0.55        | <0.001  | 37 |
| <b>Pedestrian safety</b>                                                         |             |         |    |
| Number of lanes to cross intersection                                            | 0.70        | <0.001  | 37 |
| <b>Motorized traffic and parking</b>                                             |             |         |    |
| Number of parked cars <sup>a</sup>                                               | 0.65        | <0.001  | 37 |
| Number of lanes occupied by parked cars                                          | 0.39        | 0.02    | 37 |
| <b>Infrastructure for active transportation</b>                                  |             |         |    |
| Number of bike racks                                                             | 0.84        | <0.001  | 35 |
| Bikes parked in bike racks <sup>a</sup>                                          | 0.83        | <0.001  | 35 |
| Bikes parked outside bike racks <sup>a</sup>                                     | 0.22        | 0.21    | 35 |
| Percentage of block with construction scaffolding <sup>a</sup>                   | 0.78        | <0.001  | 37 |
| <b>Sidewalk amenities</b>                                                        |             |         |    |
| Number of street lights                                                          | 0.63        | <0.001  | 37 |
| Number of standard street lamps                                                  | 0.43        | 0.007   | 37 |
| Number of decorative street lights                                               | 0.72        | <0.001  | 37 |
| Number of lights attached to buildings                                           | 0.10        | 0.55    | 36 |
| Number of chairs on sidewalk (not in outdoor café) <sup>a</sup>                  | -0.14       | 0.42    | 37 |
| Number of newspaper boxes                                                        | 0.61        | <0.001  | 37 |
| Number of phone booths                                                           | 0.56        | <0.001  | 37 |
| Number of private or business garbage cans                                       | 0.32        | 0.061   | 36 |
| Number of public garbage cans                                                    | 0.43        | 0.008   | 37 |
| Number of political or marketing sign-up tables <sup>a</sup>                     | -0.03       | 0.87    | 36 |
| Number of awnings                                                                | 0.40        | 0.02    | 36 |
| Sidewalk café chairs <sup>a</sup>                                                | 0.87        | <0.001  | 37 |
| Number of building stoops                                                        | 0.32        | 0.06    | 36 |
| Number of store-affiliated displays <sup>a</sup>                                 | 0.34        | 0.04    | 37 |
| Number of food vendors <sup>a</sup>                                              | -0.13       | 0.43    | 36 |

<sup>a</sup>Transient items
